# Supplementary material for: Design of a “Clean-Label” Gluten-Free Bread to Meet Consumers Demand
Source: PubMed Central journal article supplement (PMC7923426; doi:10.3390/foods10020462), 2021-02-20
Supplement: foods-10-00462-s001.pdf [file foods-10-00462-s001.pdf]

**Supplementary Table 1.** Formulations of the experimental doughs (DY = 210) made using protein-rich or structuring flours. Baker's yeast was used at 1.25 % (wt/wt).

|                       | CTR   | QUI   | TEF   | CHP   | FAB   | LUP   | LEN   | PEA   | PSY   | CHI   | HCHI  | FLE   | PSY-FLE | PSY-HCHI | PSY-HCHI-FLE |
|-----------------------|-------|-------|-------|-------|-------|-------|-------|-------|-------|-------|-------|-------|---------|----------|--------------|
| <i>Rice</i>           | 23.81 | 21.43 | 21.43 | 21.43 | 21.43 | 21.43 | 21.43 | 21.43 | 22.86 | 22.86 | 22.86 | 22.86 | 22.38   | 22.38    | 22.38        |
| <i>Corn</i>           | 23.81 | 21.43 | 21.43 | 21.43 | 21.43 | 21.43 | 21.43 | 21.43 | 22.86 | 22.86 | 22.86 | 22.86 | 22.38   | 22.38    | 22.38        |
| <i>Quinoa</i>         | -     | 4.76  | -     | -     | -     | -     | -     | -     | -     | -     | -     | -     | -       | -        | -            |
| <i>Teff</i>           | -     | -     | 4.76  | -     | -     | -     | -     | -     | -     | -     | -     | -     | -       | -        | -            |
| <i>Chickpea</i>       | -     | -     | -     | 4.76  | -     | -     | -     | -     | -     | -     | -     | -     | -       | -        | -            |
| <i>Faba</i>           | -     | -     | -     | -     | 4.76  | -     | -     | -     | -     | -     | -     | -     | -       | -        | -            |
| <i>Lupin</i>          | -     | -     | -     | -     | -     | 4.76  | -     | -     | -     | -     | -     | -     | -       | -        | -            |
| <i>Red lentil</i>     | -     | -     | -     | -     | -     | -     | 4.76  | -     | -     | -     | -     | -     | -       | -        | -            |
| <i>Pea</i>            | -     | -     | -     | -     | -     | -     | -     | 4.76  | -     | -     | -     | -     | -       | -        | -            |
| <i>Psyllium</i>       | -     | -     | -     | -     | -     | -     | -     | -     | 1.90  | -     | -     | -     | 1.90    | 1.90     | 1.90         |
| <i>Chia</i>           | -     | -     | -     | -     | -     | -     | -     | -     | -     | 1.90  | -     | -     | -       | -        | -            |
| <i>Hydrated chia*</i> | -     | -     | -     | -     | -     | -     | -     | -     | -     | -     | 7.62  | -     | -       | 3.81     | 1.90         |
| <i>Flaxseed</i>       | -     | -     | -     | -     | -     | -     | -     | -     | -     | -     | -     | 1.90  | 0.96    | -        | 0.48         |
| <i>Water</i>          | 52.38 | 52.38 | 52.38 | 52.38 | 52.38 | 52.38 | 52.38 | 52.38 | 52.38 | 52.38 | 46.66 | 52.38 | 52.38   | 49.53    | 50.96        |

Data are expressed as percentage (%) of total dough weight.

\* The hydration process (chia flour: tap water ratio, 1:3) was carried out for 30 min at 20 °C.

**Supplementary Table 2.** Formulations of the experimental sourdoughs (DY = 210) made with rice and corn flours, and supplemented with quinoa and chestnut flours (10 or 20% of the flours total weight). Sourdoughs were fermented by *Weissella cibaria* P9 (initial cell density in dough of 7.0 log<sub>10</sub> cfu/g) at 30 °C for 24 h.

|                 | s-CT  | s-C10 | s-C20 | s-Q10 | s-Q20 | s-CQ10 |
|-----------------|-------|-------|-------|-------|-------|--------|
| <i>Rice</i>     | 23.81 | 21.43 | 19.05 | 21.43 | 19.05 | 19.05  |
| <i>Corn</i>     | 23.81 | 21.43 | 19.05 | 21.43 | 19.05 | 19.05  |
| <i>Chestnut</i> | -     | 4.76  | 9.52  | -     | -     | 4.76   |
| <i>Quinoa</i>   | -     | -     | -     | 4.76  | 9.52  | 4.76   |
| <i>Water</i>    | 52.38 | 52.38 | 52.38 | 52.38 | 52.38 | 52.38  |

Data are expressed as percentage (%) of total dough weight.
